# Supplementary material for: Community structure of planktonic methane-oxidizing bacteria in a subtropical reservoir characterized by dominance of phylotype closely related to nitrite reducer
Source: PubMed Central journal article supplement — Sci Rep. 2014 Jul 25;4:5728. doi: 10.1038/srep05728 (PMC4124587; doi:10.1038/srep05728), 2014-07-25
Supplement: srep05728-s1.pdf [file srep05728-s1.pdf]

## Supplementary Information

Community structure of planktonic methane-oxidizing bacteria in a subtropical reservoir characterized by dominance of phylotype closely related to nitrite reducer

Hisaya Kojima<sup>1</sup>, Riho Tokizawa<sup>1</sup>, Kouhei Kogure<sup>1</sup>, Yuki Kobayashi<sup>2</sup>, Masayuki Itoh<sup>3</sup>, Fuh-Kwo Shiah<sup>2</sup>, Noboru Okuda<sup>4</sup>, and Manabu Fukui<sup>1</sup>

1. The Institute of Low Temperature Science, Hokkaido University, Sapporo, Japan
2. Research Center for Environmental Changes, Academia Sinica, Taipei, Taiwan
3. Center for Southeast Asian Studies, Kyoto University, Kyoto, Japan
4. Center for Ecological Research, Kyoto University, Otsu, Japan

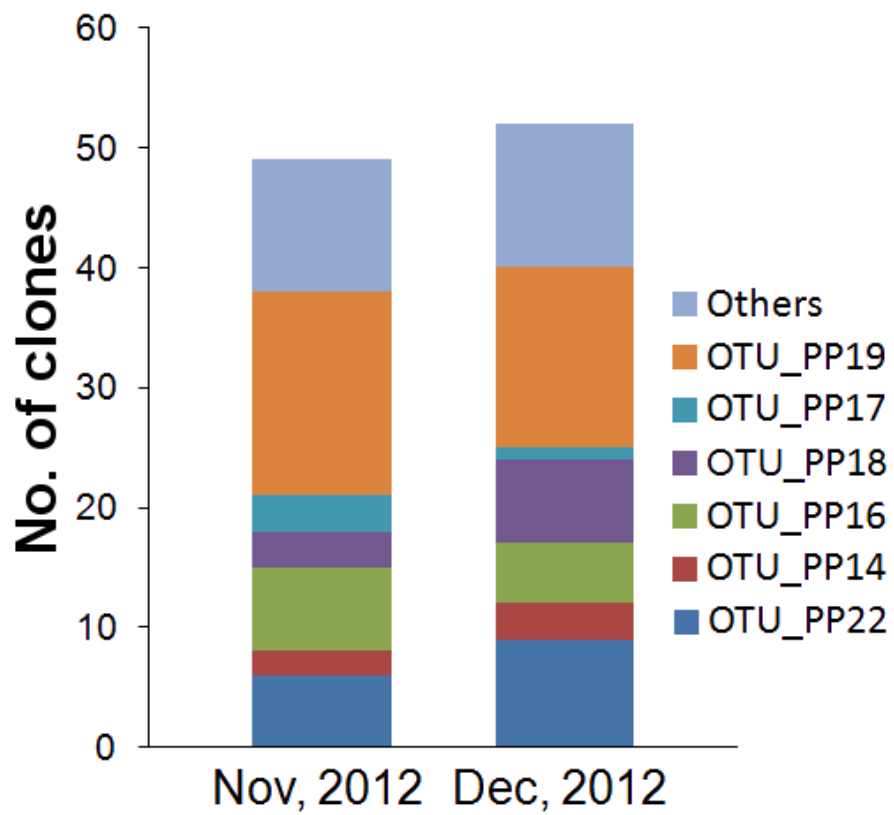

Figure S1. The compositions of the proteobacterial *pmoA* clone libraries. OTUs detected in both libraries are indicated with a number.

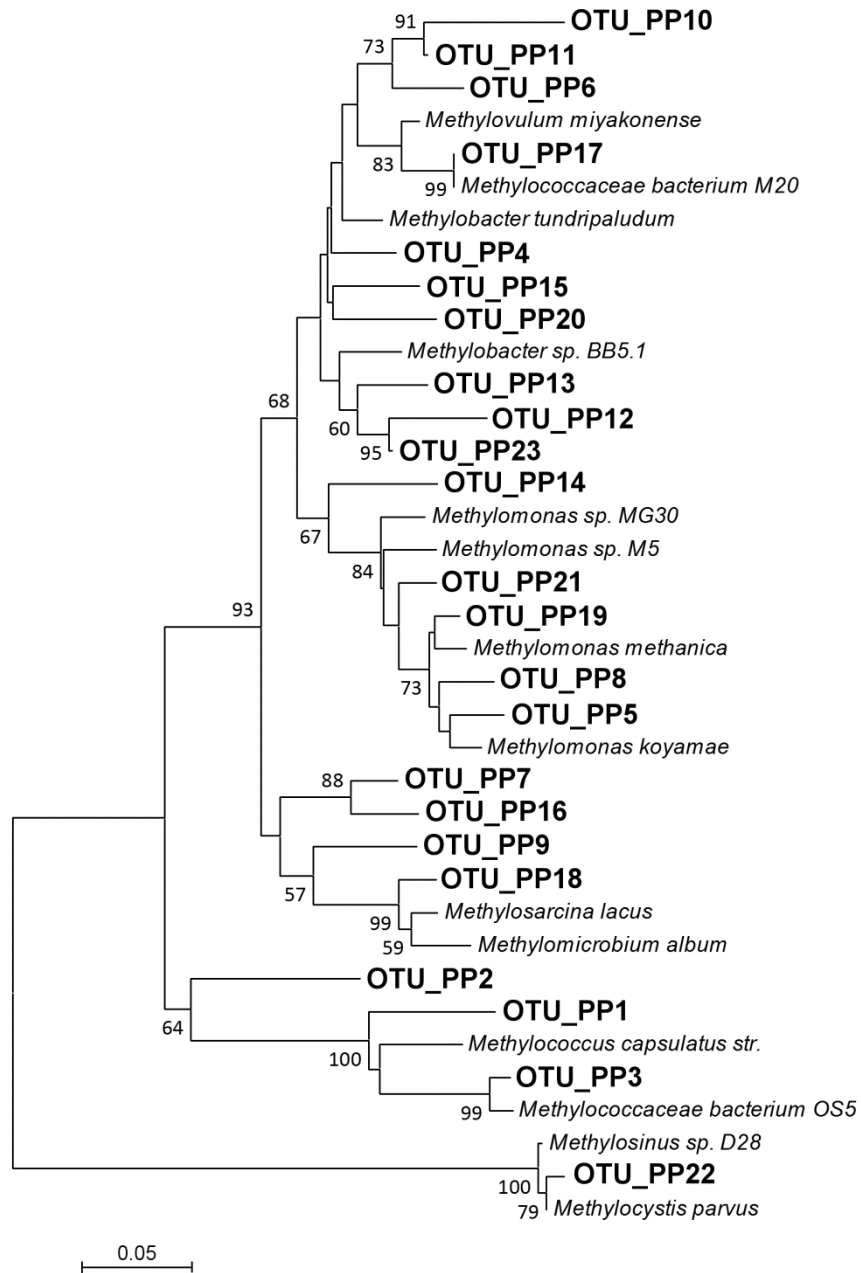

Figure S2. Phylogenetic relationships of the OTUs of proteobacterial *pmoA* clones obtained in this study. Numbers on nodes are percentage values of 1000 bootstrap resampling (values larger than 50 are shown).

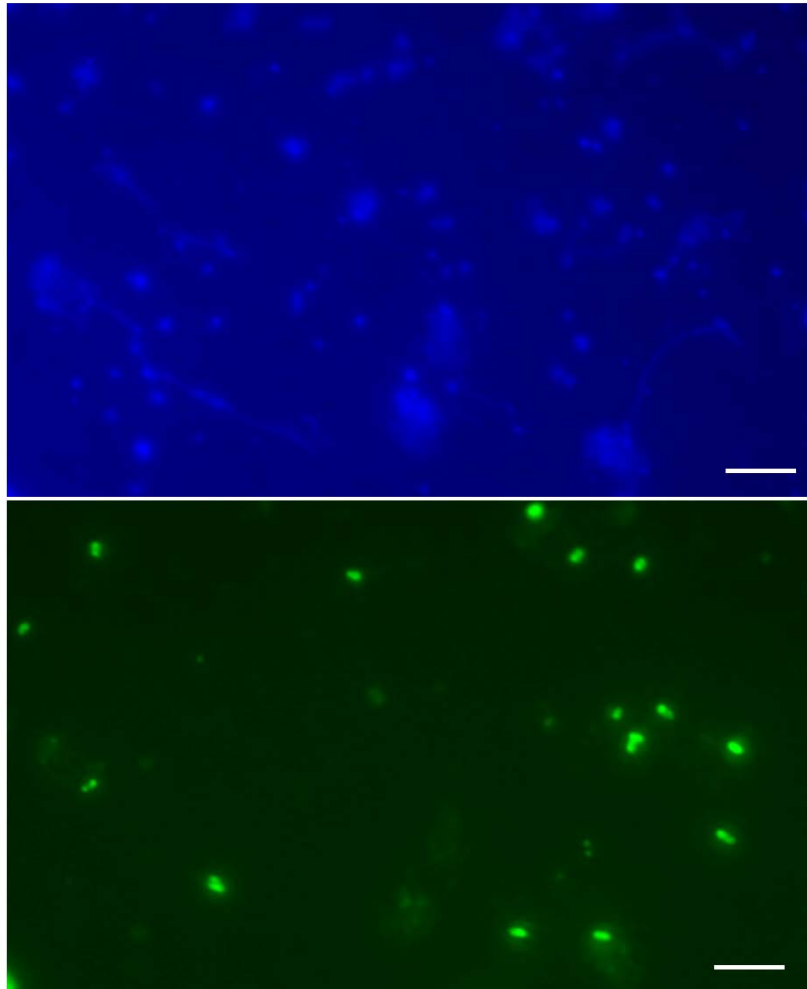

Figure S3. Cells of NC10 bacteria visualized by CARD-FISH. CARD-FISH-positive cells are shown in lower panel, and DAPI staining of the same field is shown in upper panel. Bars indicate 5  $\mu\text{m}$ .

Table S1. Phylum-level composition of the 16S rRNA gene libraries. Class-level composition is shown for Proteobacteria. Clone numbers in each library are presented.

|                                    | Nov, 2012 |      | Dec, 2012 |      | Jul, 2013 | Dec, 2013 |      |
|------------------------------------|-----------|------|-----------|------|-----------|-----------|------|
|                                    | 10 m      | 90 m | 10 m      | 90 m | 90 m      | 10 m      | 90 m |
| <i>Alphaproteobacteria</i>         | 5         | 6    | 6         | 7    | 3         | 6         | 1    |
| <i>Betaproteobacteria</i>          | 3         | 12   | 1         | 8    | 9         | 8         | 9    |
| <i>Gammaproteobacteria</i>         | 3         | 5    | 4         | 6    | 7         | 2         | 3    |
| <i>Deltaproteobacteria</i>         | 2         | 3    | 1         | 1    |           |           | 3    |
| <i>Epsilonproteobacteria</i>       |           |      |           |      | 1         |           |      |
| Unclassified <i>Proteobacteria</i> | 1         |      |           |      |           |           |      |
| <i>Actinobacteria</i>              | 3         |      | 1         |      | 2         |           | 1    |
| <i>Cyanobacteria/Chloroplast</i>   | 5         | 1    | 10        |      |           | 10        |      |
| <i>Verrucomicrobia</i>             | 1         | 1    | 2         | 5    | 4         | 6         | 3    |
| <i>Bacteroidetes</i>               | 7         | 10   | 8         | 7    | 4         | 12        | 7    |
| <i>Acidobacteria</i>               | 1         | 2    | 3         | 1    |           |           |      |
| <i>Nitrospira</i>                  | 2         | 3    |           |      | 1         | 4         |      |
| <i>Chlorobi</i>                    | 1         | 2    |           | 4    |           |           |      |
| <i>Chloroflexi</i>                 |           |      |           | 2    |           | 1         |      |
| <i>Armatimonadetes</i>             |           |      |           | 1    | 2         |           | 1    |
| <i>Firmicutes</i>                  | 1         | 1    |           |      | 3         |           | 1    |
| <i>Planctomycetes</i>              | 3         | 1    |           |      |           | 1         |      |
| OD1                                |           |      |           |      |           |           | 1    |
| <i>Gemmatimonadetes</i>            |           |      |           |      | 1         |           |      |
| Unclassified Bacteria              | 4         | 20   | 1         | 11   | 11        | 3         | 14   |

Table S2. Distribution of the OTUs of 16S rRNA gene corresponding to MOB species. Clone numbers in each library are shown.

| Library    | Type I |        |        |        |        |        |        |        | Type II | NC10   |
|------------|--------|--------|--------|--------|--------|--------|--------|--------|---------|--------|
|            | OTU_G1 | OTU_G2 | OTU_G3 | OTU_G4 | OTU_G5 | OTU_G6 | OTU_G7 | OTU_G8 | OTU_A1  | OTU_N1 |
| 2012Nov10m | 0      | 0      | 0      | 0      | 0      | 0      | 0      | 0      | 1       | 0      |
| 2012Nov90m | 2      | 0      | 1      | 0      | 0      | 0      | 0      | 0      | 2       | 12     |
| 2012Dec10m | 0      | 0      | 0      | 0      | 0      | 1      | 0      | 1      | 0       | 0      |
| 2012Dec90m | 3      | 0      | 0      | 0      | 1      | 0      | 0      | 0      | 5       | 9      |
| 2013Jul90m | 4      | 0      | 0      | 1      | 1      | 0      | 1      | 0      | 1       | 5      |
| 2013Dec10m | 0      | 0      | 0      | 0      | 0      | 0      | 0      | 0      | 4       | 0      |
| 2013Dec90m | 1      | 1      | 0      | 0      | 0      | 0      | 0      | 0      | 1       | 10     |
